# Supplementary material
Source: PubMed Central journal article supplement (PMC4949999)
Supplement: JMR-29-266-s001.pdf [file JMR-29-266-s001.pdf]

# Supplementary material: Antibody humanization by molecular dynamics simulations – in-silico guided selection of critical backmutations

Christian Margreitter,<sup>#a</sup> Patrick Mayrhofer<sup>#b</sup>, Renate Kunert<sup>b</sup> and Chris Oostenbrink<sup>\*a</sup>

## Content:

Table S1: properties of selected amino acid side-chains, mutated in the training set.

Table S2: Occurrences of amino acids at the position equivalent to R98 in human germline genes.

Figure S1: Comparison of computational scores from 40 ns and 90 ns trajectories for the training set.

Figure S2: Average atom-positional root-mean-square deviations over the last 20 ns of all replicates for the training set.

Figure S3: Average atom-positional root-mean-square deviations over the last 20 ns of all replicates for the superhumanized variants.

Figure S4:  $\beta$ -strand fractions over the last 40 ns of all replicates for the training set.

---

a C. Margreitter, Dr. C. Oostenbrink  
Institute of Molecular Modeling and Simulation  
University of Natural Resources and Life Sciences  
Muthgasse 18, 1190 Vienna  
E-mail: chris.oostenbrink@boku.ac.at

b P. Mayrhofer, Dr. R. Kunert  
Department of Biotechnology  
University of Natural Resources and Life Sciences  
Muthgasse 18, 1190 Vienna  
E-mail: renate.kunert@boku.ac.at

# Both authors contributed equally to the work.

\* To whom correspondence should be addressed.

| <b>wt3H6</b>      | <b>properties</b>                   | <b>su3H6</b>      | <b>properties</b>                | <b>possible function</b>                                                                                 | <b>position in crystal</b>                                            |
|-------------------|-------------------------------------|-------------------|----------------------------------|----------------------------------------------------------------------------------------------------------|-----------------------------------------------------------------------|
| A68 <sup>HC</sup> | small,<br>aliphatic,<br>hydrophobic | V68 <sup>HC</sup> | aliphatic,<br>hydrophobic        | backmutated in GC3H6, part of<br>Vernier zone                                                            | surface, facing towards<br>CDR-H2/beta-sheet<br>(stabilizing barrel?) |
| V72 <sup>HC</sup> | aliphatic,<br>hydrophobic           | A72 <sup>HC</sup> | small, aliphatic,<br>hydrophobic | backmutated in GC3H6 and<br>GA3H6, defining canonical<br>CDR structure class, part of<br>Vernier zone    | surface, underneath CDR-H2                                            |
| R98 <sup>HC</sup> | basic                               | T98 <sup>HC</sup> | polar,<br>uncharged              | backmutated in GC3H6 and<br>GA3H6, defining canonical<br>CDR structure class, part of<br>Vernier zone    | between CDR-H1 and CDR-<br>H3 (stabilizing Ag binding<br>site)        |
| V4 <sup>LC</sup>  | aliphatic,<br>hydrophobic           | L4 <sup>LC</sup>  | aliphatic,<br>hydrophobic        | backmutated in GC3H6, part of<br>Vernier zone                                                            | surface, facing towards<br>CDR-L3/beta-sheet<br>(stabilizing barrel?) |
| R45 <sup>LC</sup> | basic                               | I45 <sup>LC</sup> | aliphatic,<br>hydrophobic        | backmutated in GC3H6, buried<br>in V <sub>H</sub> /V <sub>L</sub> interface, not part of<br>Vernier zone | surface, interaction with<br>CDR-L2?                                  |
| D85 <sup>LC</sup> | acidic                              | Y85 <sup>LC</sup> | aromatic,<br>hydrophobic         | backmutated in GC3H6 and<br>GA3H6, affects overall protein<br>stability                                  | interaction with Kappa<br>constant region?                            |

*Table S1: Properties of amino acid side-chains selected for establishing wt3H6 double mutants used as a training panel (TR01-06) for MD simulations. The critical functions of these framework positions are described in Mader and Kunert, Protein Eng. Des. Sel. PEDS, 23, 947 – 954 (2010). Spatial positions in the crystal structure 3BQU are summarized.*

|                           |                      |              |
|---------------------------|----------------------|--------------|
| <b>Search parameters:</b> | Species:             | homo sapiens |
|                           | Gene type:           | variable     |
|                           | Functionality:       | functional   |
|                           | Locus                | IGH          |
|                           | Molecular component: | IG           |

| Residue       | Number of alleles | % of total |
|---------------|-------------------|------------|
| Arginine (R)  | 175               | 80%        |
| Threonine (T) | 10                | 5%         |
| Lysine (K)    | 24                | 11%        |
| Histidine (H) | 7                 | 3%         |
| Alanine (A)   | 2                 | 1%         |
| Total         | 218               | 100%       |

*Table S2: Conserved amino acid residues at the position equivalent to R98 in the human IGHV germline genes (IMGT/Gene-DB).*

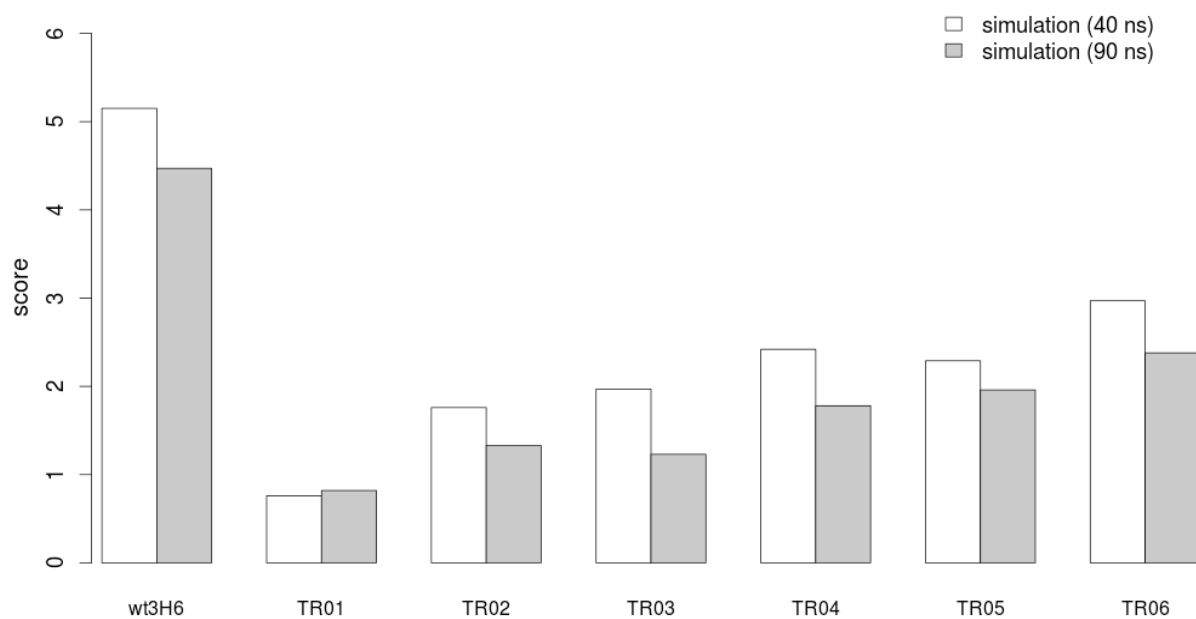

*Figure S1: Use of 90 ns trajectories for the score calculation results in a slightly lower absolute score for the variants, while retaining the relative, significant differences. Therefore, it seems reasonable to favor a higher number of replicates per variant over a individual simulation time larger than 50 ns.*

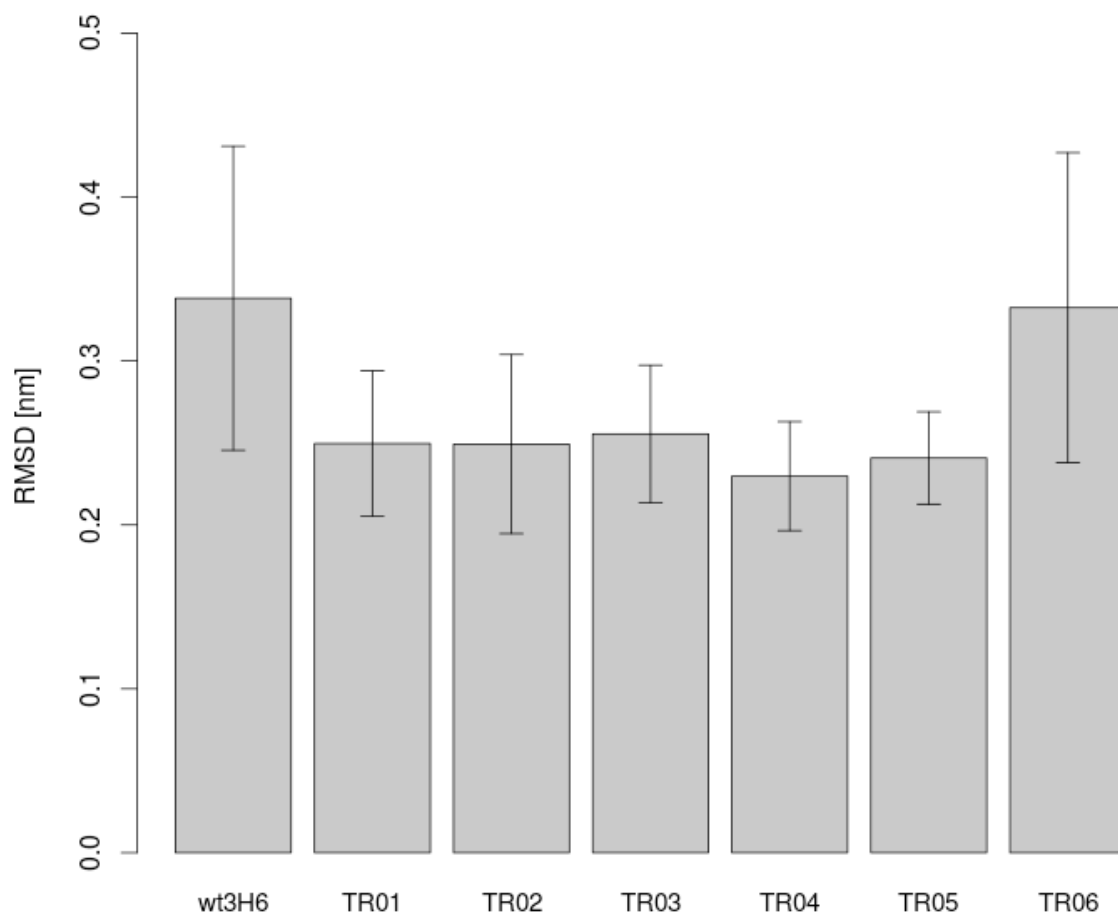

*Figure S2: The average backbone atom root-mean-square deviation (RMSD) with respect to the crystal structure over the last 20 ns of all replicates for the training set. The RMSD is calculated for all backbone atoms of the framework regions after a least-squares fit on these atoms. The error bars indicate the standard deviation.*

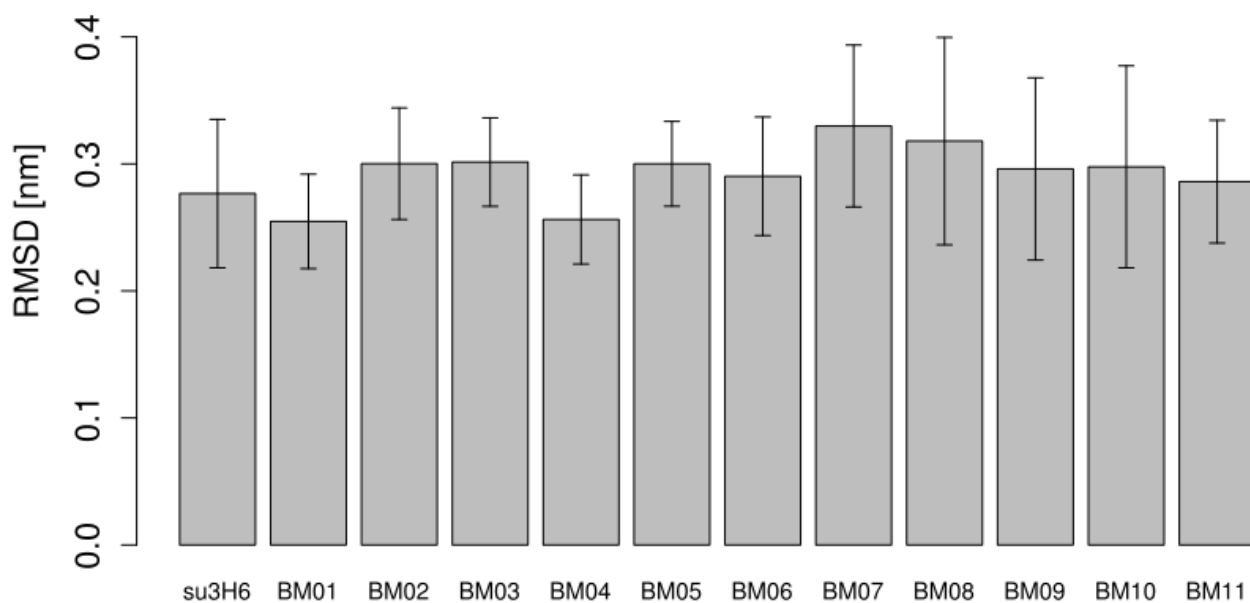

*Figure S3: The average backbone atom root-mean-square deviation (RMSD) with respect to the crystal structure over the last 20 ns of all replicates for the superhumanized variants. The RMSD is calculated for all backbone atoms of the framework regions after a least-squares fit on these atoms. The error bars indicate the standard deviation.*

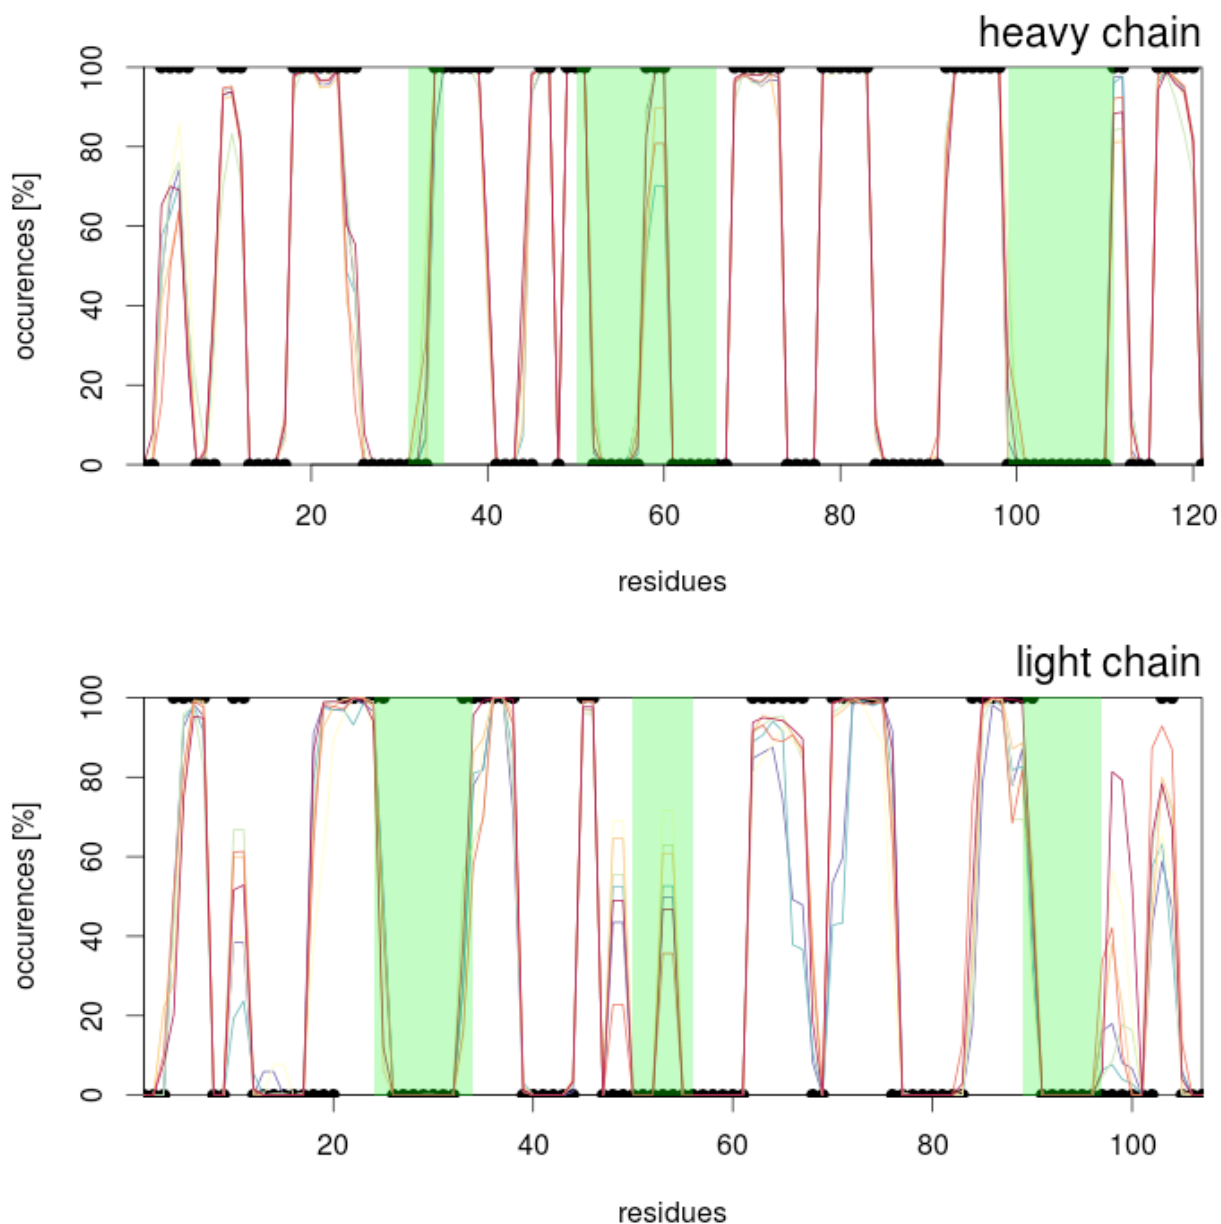

*Figure S4:  $\beta$ -strand average occurrences of conformations over the last 40 ns over all replicates for the training set as determined by the program DSSP for the framework and complementary-determining regions (CDRs; in green). The classification of the crystal structure is shown in black dots (either 100% or 0%), which agrees well with the mean values of the trajectories. This indicates a stable secondary fold throughout the simulation.*
